# Supplementary material for: Genome-Wide Identification and Characterization of Gene Families in Arachis: Methods and Strategies
Source: Front Genet. 2020 May 27;11:525. doi: 10.3389/fgene.2020.00525 (PMC7267020; doi:10.3389/fgene.2020.00525)
Supplement: Table S3 — Gene names in the four Arachis gene families. aThe E-value was set to 10 in both the HMM-based and BLAST-based methods. [file Table_3.XLS]

## Sheet: Table S3
HMM-based methoda	BLAST-based methoda	Previous study	Gene ontology term
A.duranensis Aquaporin
Aradu.0060C	Aradu.0060C	Aradu.0060C	GO:0005215 (transporter activity),GO:0006810 (transport),GO:0016020 (membrane)
Aradu.034KP	Aradu.034KP	Aradu.034KP	GO:0005215 (transporter activity)
Aradu.0NC5M	Aradu.0NC5M	Aradu.0NC5M	GO:0005215 (transporter activity),GO:0006810 (transport),GO:0016020 (membrane)
Aradu.16TP0	Aradu.16TP0	Aradu.16TP0	GO:0005215 (transporter activity),GO:0006810 (transport),GO:0016020 (membrane)
Aradu.1L636	Aradu.1L636	No detection in Previous study	GO:0005215 (transporter activity),GO:0006810 (transport),GO:0016020 (membrane)
Aradu.5QW1W	Aradu.5QW1W	No detection in Previous study	GO:0005215 (transporter activity),GO:0006810 (transport),GO:0016020 (membrane)
Aradu.617EV	Aradu.617EV	Aradu.617EV	GO:0005215 (transporter activity),GO:0006810 (transport),GO:0016020 (membrane)
Aradu.64FTH	Aradu.64FTH	Aradu.64FTH	GO:0005215 (transporter activity),GO:0006810 (transport),GO:0016020 (membrane)
Aradu.6AI81	Aradu.6AI81	Aradu.6AI81	GO:0005215 (transporter activity),GO:0006810 (transport),GO:0016020 (membrane)
Aradu.6DM00	Aradu.6DM00	No detection in Previous study	GO:0005215 (transporter activity),GO:0006810 (transport),GO:0016020 (membrane)
Aradu.7B5LR	Aradu.7B5LR	Aradu.7B5LR	GO:0005215 (transporter activity),GO:0006810 (transport),GO:0016020 (membrane)
Aradu.7MF1E	Aradu.7MF1E	Aradu.7MF1E	GO:0005215 (transporter activity),GO:0006810 (transport),GO:0016020 (membrane)
Aradu.7N61Y	Aradu.7N61Y	Aradu.7N61Y	GO:0005215 (transporter activity),GO:0006810 (transport),GO:0016020 (membrane)
Aradu.8K8TN	Aradu.8K8TN	Aradu.8K8TN	GO:0005215 (transporter activity),GO:0006810 (transport),GO:0016020 (membrane)
Aradu.901R7	Aradu.901R7	Aradu.901R7	GO:0005215 (transporter activity),GO:0006810 (transport),GO:0016020 (membrane)
Aradu.A6YMT	Aradu.A6YMT	Aradu.A6YMT	GO:0005215 (transporter activity),GO:0006810 (transport),GO:0016020 (membrane)
Aradu.DWL7L	Aradu.DWL7L	Aradu.DWL7L	GO:0005215 (transporter activity),GO:0006810 (transport),GO:0016020 (membrane)
Aradu.ERR96	Aradu.ERR96	Aradu.ERR96	GO:0005215 (transporter activity),GO:0006810 (transport),GO:0016020 (membrane)
Aradu.FDB38	Aradu.FDB38	Aradu.FDB38	GO:0005215 (transporter activity),GO:0006810 (transport),GO:0016020 (membrane)
Aradu.FHN59	Aradu.FHN59	No detection in Previous study	GO:0005215 (transporter activity),GO:0006810 (transport),GO:0016020 (membrane)
Aradu.FP96F	Aradu.FP96F	Aradu.FP96F	GO:0005215 (transporter activity),GO:0006810 (transport),GO:0016020 (membrane)
Aradu.HH10J	Aradu.HH10J	Aradu.HH10J	GO:0005215 (transporter activity),GO:0006810 (transport),GO:0016020 (membrane)
Aradu.IIE2D	Aradu.IIE2D	Aradu.IIE2D	GO:0005215 (transporter activity),GO:0006810 (transport),GO:0016020 (membrane)
Aradu.JG488	Aradu.JG488	Aradu.JG488	GO:0005215 (transporter activity),GO:0006810 (transport),GO:0016020 (membrane)
Aradu.KMP0N	Aradu.KMP0N	Aradu.KMP0N	GO:0005215 (transporter activity),GO:0006810 (transport),GO:0016020 (membrane)
Aradu.KV3KX	Aradu.KV3KX	Aradu.KV3KX	GO:0005215 (transporter activity),GO:0006810 (transport),GO:0016020 (membrane)
Aradu.LI70Z	Aradu.LI70Z	Aradu.LI70Z	GO:0005215 (transporter activity),GO:0006810 (transport),GO:0016020 (membrane)
Aradu.NQ7IA	Aradu.NQ7IA	Aradu.NQ7IA	GO:0005215 (transporter activity),GO:0006810 (transport),GO:0016020 (membrane)
Aradu.P79WU	Aradu.P79WU	No detection in Previous study	GO:0005215 (transporter activity),GO:0006810 (transport),GO:0016020 (membrane)
Aradu.PDC3W	Aradu.PDC3W	Aradu.PDC3W	GO:0005215 (transporter activity),GO:0006810 (transport),GO:0016020 (membrane)
Aradu.Q041W	Aradu.Q041W	No detection in Previous study	GO:0005215 (transporter activity),GO:0005524 (ATP binding),GO:0006810 (transport),GO:0016020 (membrane), GO:0016301 (kinase activity)
Aradu.QPP1Y	Aradu.QPP1Y	No detection in Previous study	GO:0005215 (transporter activity),GO:0006810 (transport),GO:0016020 (membrane)
Aradu.R0KJF	Aradu.R0KJF	Aradu.R0KJF	GO:0005215 (transporter activity),GO:0006810 (transport),GO:0016020 (membrane)
Aradu.R2ERN	Aradu.R2ERN	Aradu.R2ERN	GO:0005215 (transporter activity),GO:0006810 (transport),GO:0016020 (membrane)
Aradu.R6IE0	Aradu.R6IE0	Aradu.R6IE0	GO:0005215 (transporter activity),GO:0006810 (transport),GO:0016020 (membrane)
Aradu.V8K6B	Aradu.V8K6B	Aradu.V8K6B	GO:0005215 (transporter activity),GO:0006810 (transport),GO:0016020 (membrane)
Aradu.VG4AF	Aradu.VG4AF	Aradu.VG4AF	GO:0005215 (transporter activity),GO:0006810 (transport),GO:0016020 (membrane)
Aradu.VW5KP	Aradu.VW5KP	Aradu.VW5KP	GO:0005215 (transporter activity),GO:0006810 (transport),GO:0016020 (membrane)
Aradu.YIH2Y	Aradu.YIH2Y	Aradu.YIH2Y	GO:0005215 (transporter activity),GO:0006810 (transport),GO:0016020 (membrane)
A.ipaensis Aquaporin
Araip.0PG5I	Araip.0PG5I	Araip.0PG5I	GO:0005215 (transporter activity),GO:0006810 (transport),GO:0016020 (membrane)
Araip.191UR	Araip.191UR	Araip.191UR	GO:0005215 (transporter activity),GO:0006810 (transport),GO:0016020 (membrane)
Araip.21TCR	Araip.21TCR	Araip.21TCR	GO:0005215 (transporter activity),GO:0006810 (transport),GO:0016020 (membrane)
Araip.2JP01	Araip.2JP01	Araip.2JP01	GO:0005215 (transporter activity),GO:0006810 (transport),GO:0016020 (membrane)
Araip.3S8EX	Araip.3S8EX	Araip.3S8EX	GO:0005215 (transporter activity),GO:0006810 (transport),GO:0016020 (membrane)
Araip.435BM	Araip.435BM	Araip.435BM	GO:0005215 (transporter activity),GO:0006810 (transport),GO:0016020 (membrane)
Araip.46726	Araip.46726	Araip.46726	GO:0005215 (transporter activity),GO:0006810 (transport),GO:0016020 (membrane)
Araip.5F544	Araip.5F544	Araip.5F544	GO:0005215 (transporter activity),GO:0006810 (transport),GO:0016020 (membrane)
Araip.5WM90	Araip.5WM90	No detection in Previous study	GO:0005215 (transporter activity),GO:0006810 (transport),GO:0016020 (membrane)
Araip.64JV0	Araip.64JV0	Araip.64JV0	GO:0005215 (transporter activity),GO:0006810 (transport),GO:0016020 (membrane)
Araip.6FU1K	Araip.6FU1K	No detection in Previous study	GO:0005215 (transporter activity),GO:0006810 (transport),GO:0016020 (membrane)
Araip.6ZS67	Araip.6ZS67	Araip.6ZS67	GO:0005215 (transporter activity),GO:0006810 (transport),GO:0016020 (membrane)
Araip.7HI2H	Araip.7HI2H	No detection in Previous study	GO:0005215 (transporter activity),GO:0006810 (transport),GO:0016020 (membrane)
Araip.8A339	Araip.8A339	Araip.8A339	GO:0005215 (transporter activity),GO:0006810 (transport),GO:0016020 (membrane)
Araip.986AT	Araip.986AT	Araip.986AT	GO:0005215 (transporter activity),GO:0006810 (transport),GO:0016020 (membrane)
Araip.A551P	Araip.A551P	No detection in Previous study	GO:0005215 (transporter activity),GO:0006810 (transport),GO:0016020 (membrane)
Araip.AC9T7	Araip.AC9T7	Araip.AC9T7	GO:0005215 (transporter activity),GO:0006810 (transport),GO:0016020 (membrane)
Araip.F6TGS	Araip.F6TGS	Araip.F6TGS	GO:0005215 (transporter activity),GO:0006810 (transport),GO:0016020 (membrane)
Araip.FP1A1	Araip.FP1A1	Araip.FP1A1	GO:0005215 (transporter activity),GO:0006810 (transport),GO:0016020 (membrane)
Araip.FXH2B	Araip.FXH2B	Araip.FXH2B	GO:0005215 (transporter activity),GO:0006810 (transport),GO:0016020 (membrane)
Araip.GD9LP	Araip.GD9LP	No detection in Previous study	GO:0005215 (transporter activity),GO:0006810 (transport),GO:0016020 (membrane)
Araip.GMD2H	Araip.GMD2H	Araip.GMD2H	GO:0005215 (transporter activity),GO:0006810 (transport),GO:0016020 (membrane)
Araip.GV0WJ	Araip.GV0WJ	No detection in Previous study	GO:0005215 (transporter activity),GO:0006810 (transport),GO:0016020 (membrane)
Araip.H2UIN	Araip.H2UIN	No detection in Previous study	GO:0005215 (transporter activity),GO:0006810 (transport),GO:0016020 (membrane)
Araip.H4L5F	Araip.H4L5F	Araip.H4L5F	GO:0005215 (transporter activity),GO:0006810 (transport),GO:0016020 (membrane)
Araip.IMH7R	Araip.IMH7R	No detection in Previous study	GO:0005215 (transporter activity),GO:0006810 (transport),GO:0016020 (membrane)
Araip.K65JZ	Araip.K65JZ	Araip.K65JZ	GO:0005215 (transporter activity),GO:0006810 (transport),GO:0016020 (membrane)
Araip.LJX8Z	Araip.LJX8Z	Araip.LJX8Z	GO:0005215 (transporter activity),GO:0006810 (transport),GO:0016020 (membrane)
Araip.LMJ0Y	Araip.LMJ0Y	Araip.LMJ0Y	GO:0005215 (transporter activity),GO:0006810 (transport),GO:0016020 (membrane)
Araip.M00I0	Araip.M00I0	Araip.M00I0	GO:0005215 (transporter activity),GO:0006810 (transport),GO:0016020 (membrane)
Araip.M498N	Araip.M498N	No detection in Previous study	GO:0005215 (transporter activity),GO:0006810 (transport),GO:0016020 (membrane)
Araip.PA6GK	Araip.PA6GK	Araip.PA6GK	GO:0005215 (transporter activity),GO:0006810 (transport),GO:0016020 (membrane)
Araip.RLY0Z	Araip.RLY0Z	Araip.RLY0Z	GO:0005215 (transporter activity),GO:0006810 (transport),GO:0016020 (membrane)
Araip.TV5XY	Araip.TV5XY	No detection in Previous study	GO:0005215 (transporter activity),GO:0006810 (transport),GO:0016020 (membrane)
Araip.U0Y4C	Araip.U0Y4C	Araip.U0Y4C	GO:0005215 (transporter activity),GO:0006810 (transport),GO:0016020 (membrane)
Araip.U5J78	Araip.U5J78	Araip.U5J78	GO:0005215 (transporter activity),GO:0006810 (transport),GO:0016020 (membrane)
Araip.UB1TB	Araip.UB1TB	Araip.UB1TB	GO:0005215 (transporter activity),GO:0006810 (transport),GO:0016020 (membrane)
Araip.V65E2	Araip.V65E2	No detection in Previous study	GO:0005215 (transporter activity),GO:0006810 (transport),GO:0016020 (membrane)
Araip.V6V8W	Araip.V6V8W	Araip.V6V8W	GO:0005215 (transporter activity),GO:0006810 (transport),GO:0016020 (membrane)
Araip.XJU6V	Araip.XJU6V	Araip.XJU6V	GO:0005215 (transporter activity),GO:0006810 (transport),GO:0016020 (membrane)
Araip.Y3AUB	Araip.Y3AUB	Araip.Y3AUB	GO:0005215 (transporter activity),GO:0006810 (transport),GO:0016020 (membrane)
Araip.Y41GL	Araip.Y41GL	Araip.Y41GL	GO:0005215 (transporter activity),GO:0006810 (transport),GO:0016020 (membrane)
Araip.Y47XB	Araip.Y47XB	Araip.Y47XB	GO:0005215 (transporter activity),GO:0006810 (transport),GO:0016020 (membrane)
Araip.Y6XIR	Araip.Y6XIR	Araip.Y6XIR	GO:0005215 (transporter activity),GO:0006810 (transport),GO:0016020 (membrane)
Araip.Y94H3	Araip.Y94H3	Araip.Y94H3	GO:0005215 (transporter activity),GO:0006810 (transport),GO:0016020 (membrane)
Araip.YMW6F	Araip.YMW6F	Araip.YMW6F	GO:0005215 (transporter activity),GO:0006810 (transport),GO:0016020 (membrane)
A.duranensis Expasin
Aradu.06Y10	Aradu.06Y10	Aradu.06Y10	GO:0005576 (extracellular region)
Aradu.0QC7R	Aradu.0QC7R	Aradu.0QC7R	GO:0005576 (extracellular region)
Aradu.11776	Aradu.11776	Aradu.11776	GO:0005576 (extracellular region),GO:0009664 (plant-type cell wall organization)
Aradu.28WLZ	Aradu.28WLZ	Aradu.28WLZ	GO:0005576 (extracellular region),GO:0009664 (plant-type cell wall organization)
Aradu.78HGD	Aradu.78HGD	Aradu.78HGD	GO:0005576 (extracellular region),GO:0009664 (plant-type cell wall organization)
Aradu.83MPA	Aradu.83MPA	Aradu.83MPA	GO:0005576 (extracellular region),GO:0019953 (sexual reproduction)
Aradu.8YD7R	Aradu.8YD7R	Aradu.8YD7R	GO:0005576 (extracellular region),GO:0009664 (plant-type cell wall organization)
Aradu.B37AA	Aradu.B37AA	Aradu.B37AA	GO:0005576 (extracellular region),GO:0019953 (sexual reproduction)
Aradu.CS1KJ	Aradu.CS1KJ	Aradu.CS1KJ	GO:0005576 (extracellular region),GO:0019953 (sexual reproduction)
Aradu.D2VN6	Aradu.D2VN6	Aradu.D2VN6	GO:0005576 (extracellular region),GO:0009664 (plant-type cell wall organization)
Aradu.DSS3T	Aradu.DSS3T	Aradu.DSS3T	GO:0005576 (extracellular region),GO:0009664 (plant-type cell wall organization)
Aradu.E1MX8	Aradu.E1MX8	Aradu.E1MX8	GO:0005576 (extracellular region),GO:0009664 (plant-type cell wall organization)
Aradu.EF2HR	Aradu.EF2HR	Aradu.EF2HR	GO:0005576 (extracellular region),GO:0009664 (plant-type cell wall organization)
Aradu.F00XS	Aradu.F00XS	Aradu.F00XS	No detection
Aradu.G235T	Aradu.G235T	Aradu.G235T	GO:0005576 (extracellular region),GO:0009664 (plant-type cell wall organization)
Aradu.G90WF	Aradu.G90WF	Aradu.G90WF	GO:0005576 (extracellular region),GO:0009664 (plant-type cell wall organization)
Aradu.IV1W2	Aradu.IV1W2	Aradu.IV1W2	GO:0005576 (extracellular region),GO:0009664 (plant-type cell wall organization)
Aradu.IV8SJ	Aradu.IV8SJ	Aradu.IV8SJ	GO:0005576 (extracellular region),GO:0009664 (plant-type cell wall organization)
Aradu.J8M2H	Aradu.J8M2H	Aradu.J8M2H	GO:0005576 (extracellular region),GO:0019953 (sexual reproduction)
Aradu.JZT16	Aradu.JZT16	Aradu.JZT16	GO:0005576 (extracellular region),GO:0009664 (plant-type cell wall organization)
Aradu.K3ZSF	Aradu.K3ZSF	Aradu.K3ZSF	GO:0005576 (extracellular region),GO:0009664 (plant-type cell wall organization)
Aradu.KH5IZ	No detection in BLAST-based method	Aradu.KH5IZ	GO:0005576 (extracellular region)
Aradu.KJE7Z	Aradu.KJE7Z	Aradu.KJE7Z	GO:0005576 (extracellular region),GO:0009664 (plant-type cell wall organization)
Aradu.LH96L	Aradu.LH96L	Aradu.LH96L	GO:0005576 (extracellular region),GO:0009664 (plant-type cell wall organization)
Aradu.MIM9N	Aradu.MIM9N	Aradu.MIM9N	GO:0005576 (extracellular region)
Aradu.MR104	Aradu.MR104	Aradu.MR104	GO:0005576 (extracellular region)
Aradu.R6HZB	No detection in BLAST-based method	Aradu.R6HZB	No detection
Aradu.RH8VE	Aradu.RH8VE	Aradu.RH8VE	GO:0005576 (extracellular region),GO:0009664 (plant-type cell wall organization)
Aradu.S2SYE	Aradu.S2SYE	Aradu.S2SYE	GO:0005576 (extracellular region),GO:0009664 (plant-type cell wall organization)
Aradu.TA471	Aradu.TA471	Aradu.TA471	GO:0005576 (extracellular region),GO:0019953 (sexual reproduction)
Aradu.V7R7T	Aradu.V7R7T	Aradu.V7R7T	GO:0005576 (extracellular region),GO:0009664 (plant-type cell wall organization)
Aradu.V8XMS	Aradu.V8XMS	Aradu.V8XMS	GO:0005576 (extracellular region),GO:0009664 (plant-type cell wall organization)
Aradu.WLE0A	Aradu.WLE0A	Aradu.WLE0A	GO:0005576 (extracellular region),GO:0009664 (plant-type cell wall organization)
Aradu.WXM55	Aradu.WXM55	Aradu.WXM55	No detection
Aradu.X3FXV	Aradu.X3FXV	Aradu.X3FXV	GO:0005576 (extracellular region),GO:0009664 (plant-type cell wall organization)
Aradu.Y1RZK	Aradu.Y1RZK	Aradu.Y1RZK	GO:0005576 (extracellular region),GO:0009664 (plant-type cell wall organization)
Aradu.YA6WS	Aradu.YA6WS	Aradu.YA6WS	GO:0005576 (extracellular region),GO:0009664 (plant-type cell wall organization)
Aradu.YUN33	Aradu.YUN33	Aradu.YUN33	No detection
Aradu.ZD9KZ	Aradu.ZD9KZ	Aradu.ZD9KZ	GO:0005576 (extracellular region),GO:0009664 (plant-type cell wall organization)
Aradu.ZSI1P	Aradu.ZSI1P	Aradu.ZSI1P	GO:0005576 (extracellular region),GO:0019953 (sexual reproduction)
A.ipaensis Expasin
Araip.0US7S	Araip.0US7S	Araip.0US7S	GO:0005576 (extracellular region)
Araip.1S0XH	Araip.1S0XH	Araip.1S0XH	GO:0005576 (extracellular region),GO:0009664 (plant-type cell wall organization)
Araip.3PF4T	Araip.3PF4T	Araip.3PF4T	GO:0005576 (extracellular region)
Araip.5T1RR	Araip.5T1RR	Araip.5T1RR	GO:0005576 (extracellular region),GO:0009664 (plant-type cell wall organization)
Araip.60USQ	Araip.60USQ	Araip.60USQ	GO:0005576 (extracellular region),GO:0019953 (sexual reproduction)
Araip.6T20K	Araip.6T20K	No detection in Previous study	GO:0005515 (protein binding)
Araip.6ZC3D	Araip.6ZC3D	Araip.6ZC3D	GO:0005576 (extracellular region),GO:0009664 (plant-type cell wall organization)
Araip.78H4F	Araip.78H4F	Araip.78H4F	GO:0005576 (extracellular region),GO:0009664 (plant-type cell wall organization)
Araip.7X4B0	Araip.7X4B0	Araip.7X4B0	GO:0005576 (extracellular region),GO:0009664 (plant-type cell wall organization)
Araip.B56B4	Araip.B56B4	Araip.B56B4	GO:0005576 (extracellular region),GO:0009664 (plant-type cell wall organization)
Araip.C0N7L	Araip.C0N7L	Araip.C0N7L	GO:0005576 (extracellular region),GO:0019953 (sexual reproduction)
Araip.C6CF4	Araip.C6CF4	Araip.C6CF4	GO:0005576 (extracellular region),GO:0009664 (plant-type cell wall organization)
Araip.CB643	Araip.CB643	Araip.CB643	GO:0005576 (extracellular region),GO:0019953 (sexual reproduction)
Araip.CP6UC	Araip.CP6UC	Araip.CP6UC	GO:0005576 (extracellular region)
Araip.E30MW	Araip.E30MW	Araip.E30MW	GO:0005576 (extracellular region),GO:0009664 (plant-type cell wall organization)
Araip.ED5JD	Araip.ED5JD	Araip.ED5JD	GO:0005576 (extracellular region)
Araip.ET8DJ	Araip.ET8DJ	Araip.ET8DJ	GO:0005576 (extracellular region),GO:0019953 (sexual reproduction)
Araip.EY77X	Araip.EY77X	Araip.EY77X	GO:0005576 (extracellular region),GO:0009664 (plant-type cell wall organization)
Araip.GJI86	Araip.GJI86	Araip.GJI86	GO:0005576 (extracellular region),GO:0009664 (plant-type cell wall organization)
Araip.IN0BK	Araip.IN0BK	Araip.IN0BK	GO:0005576 (extracellular region),GO:0009664 (plant-type cell wall organization)
Araip.J5ICA	Araip.J5ICA	Araip.J5ICA	GO:0005576 (extracellular region),GO:0009664 (plant-type cell wall organization)
Araip.J65RE	Araip.J65RE	Araip.J65RE	GO:0005576 (extracellular region)
Araip.K5EKQ	Araip.K5EKQ	Araip.K5EKQ	GO:0005576 (extracellular region),GO:0009664 (plant-type cell wall organization)
Araip.KC908	Araip.KC908	Araip.KC908	GO:0005576 (extracellular region),GO:0009664 (plant-type cell wall organization)
Araip.PY4YG	Araip.PY4YG	Araip.PY4YG	GO:0005576 (extracellular region),GO:0019953 (sexual reproduction)
Araip.Q051I	Araip.Q051I	Araip.Q051I	GO:0005576 (extracellular region),GO:0019953 (sexual reproduction)
Araip.QXV0R	Araip.QXV0R	Araip.QXV0R	GO:0005576 (extracellular region),GO:0009664 (plant-type cell wall organization)
Araip.QZA57	Araip.QZA57	Araip.QZA57	GO:0005576 (extracellular region),GO:0009664 (plant-type cell wall organization)
Araip.R7ESZ	Araip.R7ESZ	Araip.R7ESZ	GO:0005576 (extracellular region),GO:0019953 (sexual reproduction)
Araip.RXA31	Araip.RXA31	Araip.RXA31	GO:0005576 (extracellular region),GO:0009664 (plant-type cell wall organization)
Araip.S4H30	Araip.S4H30	Araip.S4H30	GO:0005576 (extracellular region),GO:0009664 (plant-type cell wall organization)
Araip.SE39K	Araip.SE39K	Araip.SE39K	GO:0005576 (extracellular region),GO:0009664 (plant-type cell wall organization)
Araip.T7KEI	Araip.T7KEI	Araip.T7KEI	GO:0005576 (extracellular region),GO:0009664 (plant-type cell wall organization)
Araip.TH5HB	Araip.TH5HB	Araip.TH5HB	GO:0005576 (extracellular region),GO:0009664 (plant-type cell wall organization)
Araip.TV66E	Araip.TV66E	Araip.TV66E	No detection
Araip.U67Y5	Araip.U67Y5	Araip.U67Y5	GO:0005576 (extracellular region)
Araip.UWK6L	Araip.UWK6L	Araip.UWK6L	GO:0005576 (extracellular region),GO:0009664 (plant-type cell wall organization)
Araip.V99HB	Araip.V99HB	Araip.V99HB	GO:0005576 (extracellular region),GO:0009664 (plant-type cell wall organization)
Araip.VF36H	Araip.VF36H	Araip.VF36H	GO:0005576 (extracellular region),GO:0009664 (plant-type cell wall organization)
Araip.VW283	Araip.VW283	Araip.VW283	GO:0005576 (extracellular region),GO:0009664 (plant-type cell wall organization)
Araip.XH7KH	Araip.XH7KH	Araip.XH7KH	GO:0005576 (extracellular region),GO:0009664 (plant-type cell wall organization)
Araip.Y0GXG	No detection in BLAST-based method	Araip.Y0GXG	GO:0005576 (extracellular region)
Araip.YCD42	Araip.YCD42	Araip.YCD42	GO:0005576 (extracellular region),GO:0009664 (plant-type cell wall organization)
Araip.Z6G9I	Araip.Z6G9I	Araip.Z6G9I	GO:0005576 (extracellular region),GO:0019953 (sexual reproduction)
Araip.ZBP85	Araip.ZBP85	Araip.ZBP85	GO:0005576 (extracellular region)
A.hypogaea cv.Tifrunner Growth-regulating factor
03HQ0D	No detection in BLAST-based method	No detection in Previous study	GO:0003676 (nucleic acid binding),GO:0003677 (DNA binding),GO:0004386 (helicase activity),GO:0005515 (protein binding),GO:0005524 (ATP binding),GO:0005634 (nucleus)
21S57B	21S57B	21S57B	GO:0005524 (ATP binding),GO:0005634 (nucleus)
2A7ZAY	2A7ZAY	2A7ZAY	GO:0005524 (ATP binding),GO:0005634 (nucleus)
2H34WG	2H34WG	2H34WG	No detection
41Y8R9	41Y8R9	41Y8R9	GO:0005524 (ATP binding),GO:0005634 (nucleus)
727QPL	727QPL	727QPL	GO:0005524 (ATP binding),GO:0005634 (nucleus)
7VQ11G	7VQ11G	7VQ11G	GO:0005524 (ATP binding),GO:0005634 (nucleus)
858S2J	858S2J	858S2J	GO:0005524 (ATP binding),GO:0005634 (nucleus)
8BN0DB	No detection in BLAST-based method	No detection in Previous study	GO:0003676 (nucleic acid binding),GO:0003677 (DNA binding),GO:0004386 (helicase activity),GO:0005515 (protein binding),GO:0005524 (ATP binding),GO:0005634 (nucleus)
95DHJ9	95DHJ9	95DHJ9	GO:0005524 (ATP binding),GO:0005634 (nucleus)
AF8ALP	AF8ALP	AF8ALP	GO:0005524 (ATP binding),GO:0005634 (nucleus)
AFHS7R	AFHS7R	AFHS7R	GO:0005524 (ATP binding),GO:0005634 (nucleus)
AKBJ55	AKBJ55	No detection in Previous study	GO:0005515 (protein binding),GO:0008270 (zinc ion binding)
AL1Y46	AL1Y46	No detection in Previous study	No detection
AXD4AC	No detection in BLAST-based method	No detection in Previous study	GO:0003676 (nucleic acid binding),GO:0003677 (DNA binding),GO:0004386 (helicase activity),GO:0005515 (protein binding),GO:0005524 (ATP binding),GO:0005634 (nucleus)
BL8W3W	BL8W3W	No detection in Previous study	GO:0005515 (protein binding),GO:0008270 (zinc ion binding)
BWV8RN	BWV8RN	BWV8RN	GO:0005524 (ATP binding),GO:0005634 (nucleus)
D02CS5	D02CS5	No detection in Previous study	GO:0005515 (protein binding),GO:0008270 (zinc ion binding)
D8BKSU	D8BKSU	No detection in Previous study	No detection
DZ4RFW	DZ4RFW	No detection in Previous study	No detection
E2TIJB	E2TIJB	E2TIJB	No detection
E8HE72	E8HE72	E8HE72	GO:0005524 (ATP binding),GO:0005634 (nucleus)
EY9JW7	EY9JW7	EY9JW7	GO:0005524 (ATP binding),GO:0005634 (nucleus)
FF6C67	FF6C67	FF6C67	GO:0005524 (ATP binding),GO:0005634 (nucleus)
G4PR1G	G4PR1G	G4PR1G	GO:0005524 (ATP binding),GO:0005634 (nucleus)
GQG5UP	GQG5UP	No detection in Previous study	GO:0005515 (protein binding),GO:0008270 (zinc ion binding)
HA6SXM	HA6SXM	No detection in Previous study	GO:0005515 (protein binding),GO:0008270 (zinc ion binding)
HL76U9	HL76U9	HL76U9	GO:0005524 (ATP binding),GO:0005634 (nucleus)
HNU9BA	HNU9BA	HNU9BA	GO:0005524 (ATP binding),GO:0005634 (nucleus)
IE1EN5	IE1EN5	IE1EN5	GO:0005524 (ATP binding),GO:0005634 (nucleus)
K947VD	No detection in BLAST-based method	No detection in Previous study	GO:0003676 (nucleic acid binding),GO:0003677 (DNA binding),GO:0004386 (helicase activity),GO:0005515 (protein binding),GO:0005524 (ATP binding),GO:0005634 (nucleus)
KV1X6M	KV1X6M	KV1X6M	GO:0005524 (ATP binding),GO:0005634 (nucleus)
LH07PZ	LH07PZ	LH07PZ	GO:0005524 (ATP binding),GO:0005634 (nucleus)
MSLW3U	MSLW3U	MSLW3U	GO:0005524 (ATP binding),GO:0005634 (nucleus)
N7G5LN	N7G5LN	N7G5LN	GO:0005524 (ATP binding),GO:0005634 (nucleus)
SE7UXR	SE7UXR	No detection in Previous study	No detection
SL1AZZ	SL1AZZ	No detection in Previous study	GO:0005515 (protein binding),GO:0008270 (zinc ion binding)
TZG1XT	TZG1XT	No detection in Previous study	GO:0005515 (protein binding),GO:0008270 (zinc ion binding)
V829EQ	V829EQ	V829EQ	GO:0005524 (ATP binding),GO:0005634 (nucleus)
A.duranensis Mildew resistance locus
Aradu.0YN4S	Aradu.0YN4S	No detection in Previous study	GO:0006952 (defense response),GO:0016021 (integral component of membrane)
Aradu.0YR51	Aradu.0YR51	Aradu.0YR51	GO:0006952 (defense response),GO:0016021 (integral component of membrane)
Aradu.18BQR	Aradu.18BQR	Aradu.18BQR	GO:0006952 (defense response),GO:0016021 (integral component of membrane)
Aradu.27DYI	Aradu.27DYI	Aradu.27DYI	GO:0006952 (defense response),GO:0016021 (integral component of membrane)
Aradu.48N80	Aradu.48N80	Aradu.48N80	GO:0006952 (defense response),GO:0016021 (integral component of membrane)
Aradu.5Y217	Aradu.5Y217	Aradu.5Y217	GO:0006952 (defense response),GO:0016021 (integral component of membrane)
Aradu.65SUF	Aradu.65SUF	Aradu.65SUF	GO:0006952 (defense response),GO:0016021 (integral component of membrane)
Aradu.AK182	Aradu.AK182	Aradu.AK182	GO:0006952 (defense response),GO:0016021 (integral component of membrane)
Aradu.EU0BW	Aradu.EU0BW	Aradu.EU0BW	GO:0006952 (defense response),GO:0016021 (integral component of membrane)
Aradu.MBR92	Aradu.MBR92	No detection in Previous study	GO:0006952 (defense response),GO:0016021 (integral component of membrane)
Aradu.N8G7F	Aradu.N8G7F	Aradu.N8G7F	GO:0006952 (defense response),GO:0016021 (integral component of membrane)
Aradu.NF3XX	Aradu.NF3XX	Aradu.NF3XX	GO:0006952 (defense response),GO:0016021 (integral component of membrane)
Aradu.QG7T6	Aradu.QG7T6	Aradu.QG7T6	GO:0006952 (defense response),GO:0016021 (integral component of membrane)
Aradu.SSV2N	Aradu.SSV2N	Aradu.SSV2N	GO:0006952 (defense response),GO:0016021 (integral component of membrane)
Aradu.U7W18	Aradu.U7W18	Aradu.U7W18	GO:0006952 (defense response),GO:0016021 (integral component of membrane)
Aradu.V874L	Aradu.V874L	No detection in Previous study	GO:0006952 (defense response),GO:0016021 (integral component of membrane)
Aradu.WJ2TG	Aradu.WJ2TG	Aradu.WJ2TG	GO:0006952 (defense response),GO:0016021 (integral component of membrane)
A.ipaensis Mildew resistance locus
Araip.0US16	Araip.0US16	Araip.0US16	GO:0006952 (defense response),GO:0016021 (integral component of membrane)
Araip.7B80A	Araip.7B80A	Araip.7B80A	GO:0006952 (defense response),GO:0016021 (integral component of membrane)
Araip.90S60	Araip.90S60	No detection in Previous study	GO:0006952 (defense response),GO:0016021 (integral component of membrane)
Araip.B4DCW	Araip.B4DCW	No detection in Previous study	GO:0006952 (defense response),GO:0016021 (integral component of membrane)
Araip.CFV17	Araip.CFV17	Araip.CFV17	GO:0006952 (defense response),GO:0016021 (integral component of membrane)
Araip.EPG74	Araip.EPG74	No detection in Previous study	GO:0006952 (defense response),GO:0016021 (integral component of membrane)
Araip.FPH7X	Araip.FPH7X	No detection in Previous study	GO:0006952 (defense response),GO:0016021 (integral component of membrane)
Araip.HRR0E	Araip.HRR0E	Araip.HRR0E	GO:0006952 (defense response),GO:0016021 (integral component of membrane)
Araip.L2HMX	Araip.L2HMX	Araip.L2HMX	GO:0006952 (defense response),GO:0016021 (integral component of membrane)
Araip.MQE1N	Araip.MQE1N	Araip.MQE1N	GO:0006952 (defense response),GO:0016021 (integral component of membrane)
Araip.N0DTV	Araip.N0DTV	Araip.N0DTV	GO:0006952 (defense response),GO:0016021 (integral component of membrane)
Araip.N905Y	Araip.N905Y	Araip.N905Y	GO:0006952 (defense response),GO:0016021 (integral component of membrane)
Araip.PW5DF	Araip.PW5DF	Araip.PW5DF	GO:0006952 (defense response),GO:0016021 (integral component of membrane)
Araip.SD8AP	Araip.SD8AP	Araip.SD8AP	GO:0006952 (defense response),GO:0016021 (integral component of membrane)
Araip.SR8Z2	Araip.SR8Z2	Araip.SR8Z2	GO:0006952 (defense response),GO:0016021 (integral component of membrane)
Araip.TYT2K	Araip.TYT2K	No detection in Previous study	GO:0006952 (defense response),GO:0016021 (integral component of membrane)
Araip.V6H5L	Araip.V6H5L	No detection in Previous study	GO:0006952 (defense response),GO:0016021 (integral component of membrane)
Araip.WMV74	Araip.WMV74	Araip.WMV74	GO:0006952 (defense response),GO:0016021 (integral component of membrane)
Araip.Y3LT4	Araip.Y3LT4	Araip.Y3LT4	No detection
Araip.Z2J38	Araip.Z2J38	No detection in Previous study	GO:0003677 (DNA binding),GO:0003735 (structural constituent of ribosome),GO:0003899 (DNA-directed RNA polymerase activity),GO:0005622 (intracellular), GO:0005840 (ribosome),GO:0006412 (translation),GO:0006952 (defense response),GO:0016021 (integral component of membrane)
Araip.Z8ALS	Araip.Z8ALS	Araip.Z8ALS	GO:0006952 (defense response),GO:0016021 (integral component of membrane)
